# Supplementary material
Source: ML conference proceedings conference paper supplement (https://proceedings.neurips.cc/paper_files/paper/2009/hash/9f396fe44e7c05c16873b05ec425cbad-Abstract.html)
Supplement: Supplementary file [file 9f396fe44e7c05c16873b05ec425cbad-Supplemental.zip]

---

# fMRI-Based Inter-Subject Cortical Alignment Using Functional Connectivity Supplementary Material

---

## 1 Efficient Computation of the Registration Objective

Here we derive the efficient computation of the similarity portion of the registration objective,  $\|\tilde{C}_F - C_R\|_f^2$ . Making the substitution  $\tilde{A} = W_F B W_R^T$ , we obtain:

$$\|\tilde{C}_F - C_R\|_f^2 = \|W_R B^T W_F^T C_F W_F B W_R^T - C_R\|_f^2 \quad (1)$$

$$= \left\| W_R B^T \begin{bmatrix} \Sigma_F & 0 \\ 0 & 0 \end{bmatrix} B W_R^T - C_R \right\|_f^2 \quad (2)$$

$$= \left\| W_R \left( \begin{bmatrix} B_1^T \Sigma_F B_1 & B_1^T \Sigma_F B_2 \\ B_2^T \Sigma_F B_1 & B_2^T \Sigma_F B_2 \end{bmatrix} - \begin{bmatrix} \Sigma_R & 0 \\ 0 & 0 \end{bmatrix} \right) W_R^T \right\|_f^2 \quad (3)$$

$$= \|B_1^T \Sigma_F B_1 - \Sigma_R\|_f^2 + 2 \|B_1^T \Sigma_F B_2\|_f^2 + \|B_2^T \Sigma_F B_2\|_f^2 \quad (4)$$

where we made use of the fact that  $\|OX\|_f^2 = \|XO\|_f^2 = \|X\|_f^2$  for an orthogonal matrix  $O$ .

## 2 Partial Derivative of Registration Objective

The partial derivative of the registration objective with respect to  $\tilde{\phi}_j$  is given by:

$$\frac{\partial S(g)}{\partial \tilde{\phi}_j} = \sum_{i=1}^{N_v} \frac{\partial \|\tilde{C}_F - C_R\|_f^2}{\partial \tilde{a}_{ij}} \frac{\partial \tilde{a}_{ij}}{\partial \tilde{\phi}_j} + \lambda \frac{\partial \text{Reg}(g)}{\partial \tilde{\phi}_j} \quad (5)$$

where

$$\frac{\partial \tilde{a}_{ij}}{\partial \tilde{\phi}_j} = d_j \frac{\partial a_{ij}}{\partial \tilde{\phi}_j} + a_{ij} \frac{\partial d_j}{\partial \tilde{\phi}_j} \quad (6)$$

A similar expression is obtained for  $\partial S(g) / \partial \tilde{\theta}_j$ .

First, we focus on the term  $\partial \|\tilde{C} - C_R\|_f^2 / \partial \tilde{a}_{ij}$ . Given that the Frobenius norm of a matrix  $A$  can be expressed as  $\|A\|_f^2 = \text{tr}(A^T A)$ , where  $\text{tr}(\cdot)$  is the matrix trace, we have:

$$\|\tilde{C}_F - C_R\|_f^2 = \text{tr} \left( (\tilde{C}_F - C_R) (\tilde{C}_F - C_R)^T \right) \quad (7)$$

We will now take derivatives of the expression above. Since the trace operator is linear, the derivative can be pulled inside the trace to obtain:

$$\frac{\partial \|\tilde{C}_F - C_R\|_f^2}{\partial \tilde{a}_{ij}} = 2 \text{tr} \left( (\tilde{C}_F - C_R) \frac{\partial \tilde{C}_F}{\partial \tilde{a}_{ij}} \right) \quad (8)$$

where  $\frac{\partial \tilde{C}_F}{\partial \tilde{a}_{ij}}$  is the matrix whose  $(i, j)^{th}$  entry is given by  $\partial [\tilde{C}_F]_{i,j} / \partial \tilde{a}_{ij}$ . This matrix can be computed as:

$$\frac{\partial \tilde{C}_F}{\partial \tilde{a}_{ij}} = \frac{\partial (\tilde{A}^T C_F \tilde{A})}{\partial \tilde{a}_{ij}} \quad (9)$$

$$= E_{ji} C_F \tilde{A} + \tilde{A}^T C_F E_{ij} \quad (10)$$

$$= (\tilde{A}^T C_F E_{ij})^T + \tilde{A}^T C_F E_{ij} \quad (11)$$

where  $E_{ij} = e_i e_j^T$  is the matrix with all zeros except for a one in the  $(i, j)^{th}$  entry. Substituting (11) into (8), we obtain:

$$\frac{\partial \left\| \tilde{C}_F - C_R \right\|_f^2}{\partial \tilde{a}_{ij}} = 4 \text{tr} \left( (\tilde{C}_F - C_R) \tilde{A}^T C_F E_{ij} \right) \quad (12)$$

$$= 4 \text{tr} \left( (\tilde{C}_F - C_R) \tilde{A}^T C_F e_i e_j^T \right) \quad (13)$$

$$= 4 \text{tr} \left( e_j^T (\tilde{C}_F - C_R) \tilde{A}^T C_F e_i \right) \quad (14)$$

$$= 4 \left[ C_F \tilde{A} (\tilde{C}_F - C_R) \right]_{i,j} \quad (15)$$

The matrix  $C_F \tilde{A} (\tilde{C}_F - C_R)$  can be simplified further using the matrix decomposition  $\tilde{A} = W_F B W_R^T$ . First, note that:

$$C_F \tilde{A} = V_F \Sigma_F V_F^T W_F B W_R^T \quad (16)$$

$$= V_F \Sigma_F [B_1 \ B_2] W_R^T \quad (17)$$

and:

$$(\tilde{C}_F - C_R) = W_R \left( \begin{bmatrix} B_1^T \\ B_2^T \end{bmatrix} \Sigma_F V_F^T \tilde{A} - \begin{bmatrix} \Sigma_R \\ 0 \end{bmatrix} V_R^T \right) \quad (18)$$

Multiplying the two, we obtain:

$$C_F \tilde{A} (\tilde{C}_F - C_R) = V_F \Sigma_F \left[ (B_1 B_1^T + B_2 B_2^T) \Sigma_F V_F^T \tilde{A} - B_1 \Sigma_R V_R^T \right] \quad (19)$$

In practice, only select entries of the  $N_v \times N_v$  matrix  $C_F \tilde{A} (\tilde{C}_F - C_R)$  need to be computed, since the interpolation kernel is locally supported. These entries can be computed from (19), by taking inner products of rows of the  $N_v \times d$  matrix  $V_F \Sigma_F$  with columns of the  $d \times N_v$  matrix  $\left[ (B_1 B_1^T + B_2 B_2^T) \Sigma_F V_F^T \tilde{A} - B_1 \Sigma_R V_R^T \right]$ .

Now, we turn to partial derivatives of  $a_{ij} = \Phi_i \left( x \left( \tilde{\phi}_j, \tilde{\theta}_j \right) \right)$  with respect to  $\tilde{\phi}_j$  and  $\tilde{\theta}_j$ . Since  $\Phi_i \left( x \left( \tilde{\phi}_j, \tilde{\theta}_j \right) \right) = \varphi(s)$ , where  $s = d \left( x \left( \tilde{\phi}_j, \tilde{\theta}_j \right), p_i \right)$  is the geodesic distance between  $g(p_j)$  and  $p_i$ , we can compute partials using the chain rule:  $\frac{\partial a_{ij}}{\partial \tilde{\phi}_j} = \frac{\partial \varphi}{\partial s} \frac{\partial s}{\partial \tilde{\phi}_j}$  and  $\frac{\partial a_{ij}}{\partial \tilde{\theta}_j} = \frac{\partial \varphi}{\partial s} \frac{\partial s}{\partial \tilde{\theta}_j}$ . Let  $p_i = x(\phi_i, \theta_i)$ , and assume a particular form for  $x$ :  $x(\phi, \theta) = (\cos(\phi), \sin(\phi) \sin(\theta), \sin(\phi) \cos(\theta))$ . Then  $\partial s / \partial \tilde{\phi}_j$  and  $\partial s / \partial \tilde{\theta}_j$  can be computed using the identity:

$$\cos s = \left\langle x \left( \tilde{\phi}_j, \tilde{\theta}_j \right), p_i \right\rangle \quad (20)$$

$$= \sin \tilde{\phi}_j \sin \phi_i \left( \cos \tilde{\theta}_j \cos \theta_i + \sin \tilde{\theta}_j \sin \theta_i \right) + \cos \tilde{\phi}_j \cos \phi_i \quad (21)$$

$$= \sin \tilde{\phi}_j \sin \phi_i \cos \left( \tilde{\theta}_j - \theta_i \right) + \cos \tilde{\phi}_j \cos \phi_i \quad (22)$$

Taking derivatives with respect to  $\tilde{\phi}_j$ :

$$\frac{\partial}{\partial \tilde{\phi}_j} \cos s = \frac{\partial}{\partial \tilde{\phi}_j} \left( \sin \tilde{\phi}_j \sin \phi_i \cos (\tilde{\theta}_j - \theta_i) + \cos \tilde{\phi}_j \cos \phi_i \right) \quad (23)$$

$$- \sin s \frac{\partial s}{\partial \tilde{\phi}_j} = \cos \tilde{\phi}_j \sin \phi_i \cos (\tilde{\theta}_j - \theta_i) - \sin \tilde{\phi}_j \cos \phi_i \quad (24)$$

$$\frac{\partial s}{\partial \tilde{\phi}_j} = \frac{\sin \tilde{\phi}_j \cos \phi_i - \cos \tilde{\phi}_j \sin \phi_i \cos (\tilde{\theta}_j - \theta_i)}{\sin s} \quad (25)$$

Taking derivatives with respect to  $\tilde{\theta}_j$ :

$$\frac{\partial}{\partial \tilde{\theta}_j} \cos s = \frac{\partial}{\partial \tilde{\theta}_j} \left( \sin \tilde{\phi}_j \sin \phi_i \cos (\tilde{\theta}_j - \theta_i) + \cos \tilde{\phi}_j \cos \phi_i \right) \quad (26)$$

$$- \sin s \frac{\partial s}{\partial \tilde{\theta}_j} = - \sin \tilde{\phi}_j \sin \phi_i \sin (\tilde{\theta}_j - \theta_i) \quad (27)$$

$$\frac{\partial s}{\partial \tilde{\theta}_j} = \frac{\sin \tilde{\phi}_j \sin \phi_i \sin (\tilde{\theta}_j - \theta_i)}{\sin s} \quad (28)$$

Using the radial basis function  $\varphi$  given in the main paper, we have:

$$\varphi(s) = \left( 1 - \frac{2}{r} \sin \left( \frac{s}{2} \right) \right)_+^4 \left( \frac{8}{r} \sin \left( \frac{s}{2} \right) + 1 \right) \quad (29)$$

$$\frac{\partial \varphi(s)}{\partial s} = -\frac{40}{r^2} \left( 1 - \frac{2}{r} \sin \left( \frac{s}{2} \right) \right)_+^3 \cos \left( \frac{s}{2} \right) \sin \left( \frac{s}{2} \right) \quad (30)$$

$$= -\frac{20}{r^2} \left( 1 - \frac{2}{r} \sin \left( \frac{s}{2} \right) \right)_+^3 \sin(s) \quad (31)$$

Thus, combining (31) with (25) and (28), we obtain:

$$\frac{\partial a_{ij}}{\partial \tilde{\phi}_j} = \frac{20}{r^2} \left( 1 - \frac{2}{r} \sin \left( \frac{s}{2} \right) \right)_+^3 \left( \cos \tilde{\phi}_j \sin \phi_i \cos (\tilde{\theta}_j - \theta_i) - \sin \tilde{\phi}_j \cos \phi_i \right) \quad (32)$$

$$\frac{\partial a_{ij}}{\partial \tilde{\theta}_j} = \frac{20}{r^2} \left( 1 - \frac{2}{r} \sin \left( \frac{s}{2} \right) \right)_+^3 \sin \tilde{\phi}_j \sin \phi_i \sin (\tilde{\theta}_j - \theta_i) \quad (33)$$

which are nonzero only for  $s < 2 \sin^{-1}(r/2)$ .

Now we look at  $d_j$  and its partial derivatives.

$$d_j = \|T_F a(g(p_j))\|^{-1}. \quad (34)$$

$$= (a_j^T C_F a_j)^{-1/2} \quad (35)$$

where  $a_j$  is the  $j^{th}$  column of the matrix  $A$ . Then

$$\frac{\partial d_j}{\partial \tilde{\phi}_j} = -\frac{1}{2} d_j^3 \frac{\partial (a_j^T C_F a_j)}{\partial \tilde{\phi}_j} \quad (36)$$

$$= -d_j^3 a_j^T V_F \Sigma_F V_F^T \frac{\partial a_j}{\partial \tilde{\phi}_j} \quad (37)$$

Since  $a_j$  and  $\partial a_j / \partial \tilde{\phi}_j$  are sparse vectors, the expression above can be computed efficiently by sparse multiplication.

### 3 Computing Leave-one-out Templates

The leave-one-out template  $\bar{C}_k$  for subject  $k \in 1, \dots, N_s$  is given by:

$$\bar{C}_k = \frac{1}{N_s - 1} \sum_{j \neq k} \tilde{C}_j \quad (38)$$

where  $\tilde{C}_j = \tilde{V}_j \tilde{\Sigma}_j \tilde{V}_j^T$  and  $\bar{C}_k = \bar{V}_k \bar{\Sigma}_k \bar{V}_k^T$ . Here we prove that  $\text{range}(\tilde{V}_n) \subseteq \text{range}(\bar{V}_k)$  for  $n \neq k$ .

*Proof.* Select  $n \neq k$  and pick  $x \in \text{range}(\tilde{V}_n)$ . Then

$$x^T \bar{C}_k x = \frac{1}{N_s - 1} \left( x^T \left[ \sum_{j \neq k} \tilde{C}_j \right] x \right) \quad (39a)$$

$$= \frac{1}{N_s - 1} \left( x^T \tilde{C}_n x + \sum_{j \notin \{k, n\}} x^T \tilde{C}_j x \right) \quad (39b)$$

The first term in (39b) is greater than zero since  $x \in \text{range}(\tilde{V}_n)$ . The second term in (39b) is greater than or equal to zero since each  $\tilde{C}_j$  is positive semi-definite. Thus,  $x^T \bar{C}_k x > 0$ , which implies that  $x \in \text{range}(\bar{V}_k)$ .  $\square$
